# Supplementary material for: Physicochemical Characterization and Antibacterial Properties of Carbon Dots from Two Mediterranean Olive Solid Waste Cultivars
Source: MDPI journal article supplement (doi:10.3390/nano12050885), 2022-03-07
Supplement: s1 [file s1]

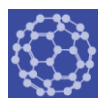

## Supplementary Material

# Physicochemical Characterization and Antibacterial Properties of Carbon Dots From Two Mediterranean Olive Solid Waste Cultivars

Giuseppe Nocito <sup>1,†</sup>, Emanuele Luigi Sciuto <sup>1,†</sup>, Domenico Franco <sup>1</sup>, Francesco Nastasi <sup>1</sup>, Luca Pulvirenti <sup>2</sup>, Salvatore Petralia <sup>3</sup>, Corrado Spinella <sup>4</sup>, Giovanna Calabrese <sup>1,\*</sup>, Salvatore Guglielmino <sup>1</sup> and Sabrina Conoci <sup>1,4,5,6,\*</sup>

<sup>1</sup>. Department of Chemical, Biological, Pharmaceutical and Environmental Sciences, University of Messina, Viale Ferdinando Stagno d'Alcontres, 31, 98168 Messina, Italy; sabrina.conoci@unime.it (S.C.); gnocito@unime.it (G.N.); emanueleluigi.sciuto@unime.it (E.L.S.); dfranco@unime.it (D.F.); fnastasi@unime.it (F.N.); gcalabrese@unime.it (G.C.); salvatore.guglielmino@unime.it (S.G.)

<sup>2</sup>. Department of Chemical Science, University of Catania, Viale A. Doria, 6, 95125 Catania, Italy; luca.pulvirenti@phd.unict.it

<sup>3</sup>. Department of Drug Science and Health, University of Catania, Viale A. Doria, 6, 95125 Catania, Italy; salvatore.petralia@unict.it

<sup>4</sup>. Istituto per la Microelettronica e Microsistemi, Consiglio Nazionale delle Ricerche (CNR-IMM) Zona Industriale, VIII Strada 5, 95121 Catania, Italy; corrado.spinella@imm.cnr.it

<sup>5</sup>. Department of Chemistry "Giacomo Ciamician", University of Bologna, Via Selmi 2, 40126 Bologna, Italy

<sup>6</sup>. LabSense Beyond Nano – URT Department of Physics – CNR Viale Ferdinando Stagno d'Alcontres, 31, 98168 Messina, Italy

\* Correspondence: sabrina.conoci@unime.it (S.C.) and gcalabrese@unime.it (G.C.)

† equal contribution

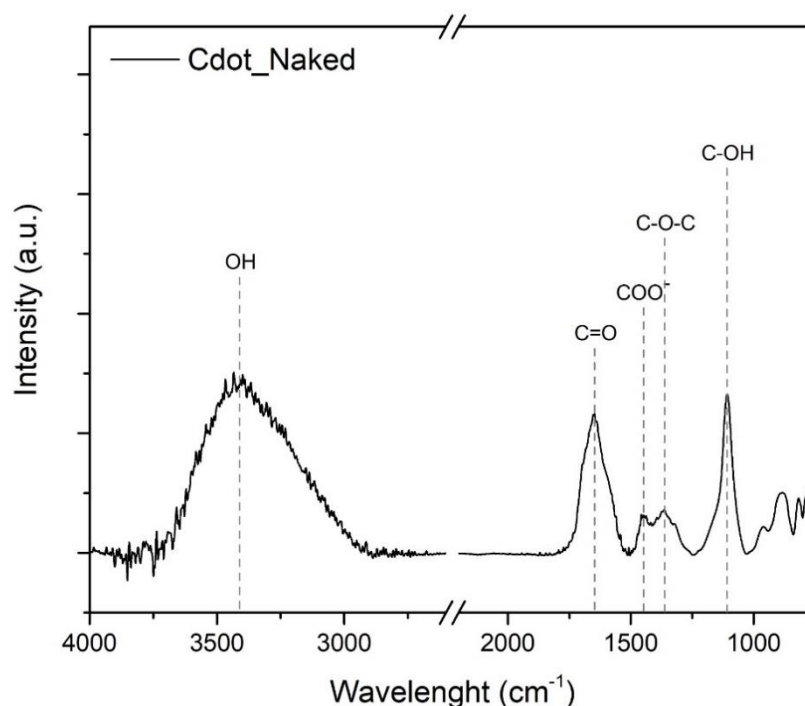

Figure S1. FTIR Spectra CDs\_C.

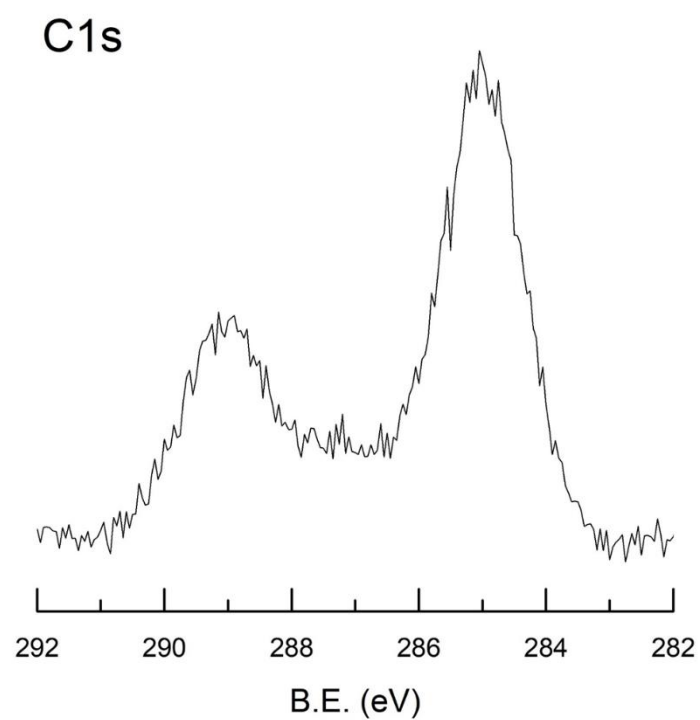

Figure S2. XPS Spectra CDs\_C.

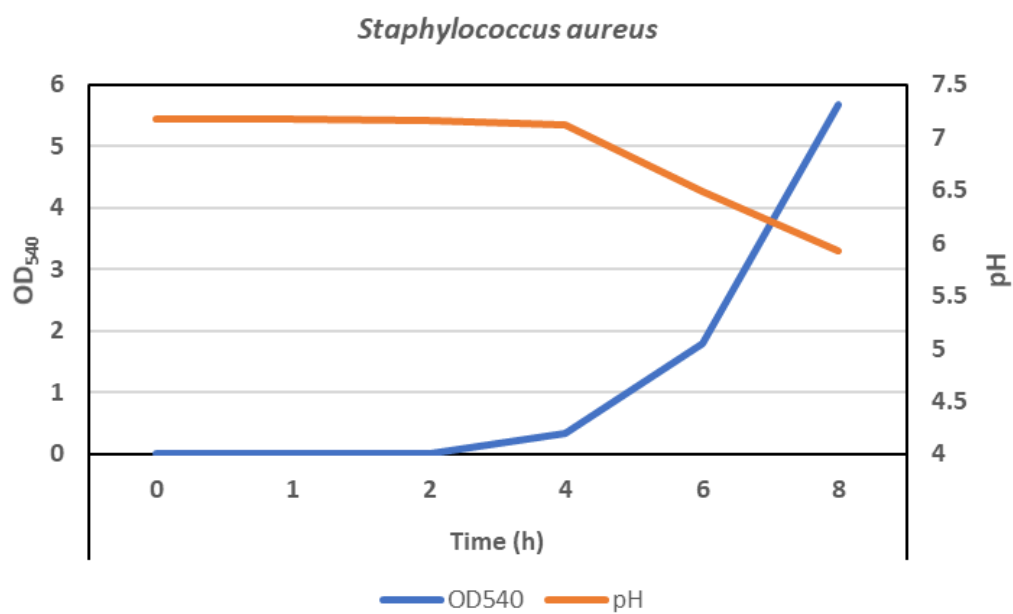

Figure S3. pH changes during *S. aureus* bacterial growth (OD<sub>540</sub>) (0–8hrs).
